# Supplementary material for: Investigating contributors to performance evaluations in small groups: Task competence, speaking time, physical expressiveness, and likability
Source: PubMed Central journal article supplement (PMC8191988; doi:10.1371/journal.pone.0252980), 2021-06-10
Supplement: pone.0252980.s004.pdf [file pone.0252980.s004.pdf]

Investigating Contributors to Performance Evaluations in Small Groups: Task Competence,  
Speaking Time, Physical Expressiveness, and Likability

Lucie Nikoleizig, Stefan C. Schmukle, Maurin Griebenow, Sascha Krause

University of Leipzig

## **Supporting Information**

### **S4: Analysis of Gender Differences**

*PLOS ONE*

Contact Information

Lucie Nikoleizig: [lucie.nikoleizig@uni-leipzig.de](mailto:lucie.nikoleizig@uni-leipzig.de)

**Analysis of Gender Differences**

To investigate differences between the all-female teams (i.e., 92 women in 23 groups) and the all-male teams (i.e., 72 men in 18 groups), we report results of hierarchical fixed effects regressions separately for women and men in Tables T1 and T2. Furthermore, we compared the complete regression models (i.e., Step 3 of the hierarchical regression) between women and men. Therefore, we computed a regression model for the all-female groups and the all-male groups without any parameter constraints in a structural equation model. The fit of this model (which was perfect given that the model's degrees of freedom equaled 0) was compared with the fit of a second model in which all path coefficients were set to the same value across the two genders. The results for the second model showed that the model fit the data very well,  $\chi^2 = 2.05$ ,  $df = 4$ ,  $p = .73$ . Altogether, these results show that there were no significant differences in the parameter estimates between genders.

Table T1

*Women: Hierarchical Fixed Effects Regression Analysis*

|                         | Team members' performance evaluations |           |          |          |                       |              | Qualified observers' performance evaluations |           |          |          |                       |              |
|-------------------------|---------------------------------------|-----------|----------|----------|-----------------------|--------------|----------------------------------------------|-----------|----------|----------|-----------------------|--------------|
|                         | <i>b</i>                              | <i>SE</i> | <i>t</i> | <i>p</i> | <i>R</i> <sup>2</sup> | $\Delta R^2$ | <i>b</i>                                     | <i>SE</i> | <i>t</i> | <i>p</i> | <i>R</i> <sup>2</sup> | $\Delta R^2$ |
| <i>Step 1</i>           |                                       |           |          |          | .206                  |              |                                              |           |          |          | .211                  |              |
| Task competence         | .020                                  | .005      | 4.20     | < .001   |                       |              | .040                                         | .009      | 4.27     | < .001   |                       |              |
| <i>Step 2</i>           |                                       |           |          |          | .476                  | .270         |                                              |           |          |          | .640                  | .429         |
| Task competence         | .011                                  | .004      | 2.75     | .008     |                       |              | .019                                         | .007      | 2.73     | .008     |                       |              |
| Speaking time           | .022                                  | .006      | 3.76     | < .001   |                       |              | .061                                         | .009      | 6.50     | < .001   |                       |              |
| Physical expressiveness | .114                                  | .055      | 2.08     | .042     |                       |              | .187                                         | .089      | 2.11     | .039     |                       |              |
| <i>Step 3</i>           |                                       |           |          |          | .491                  | .015         |                                              |           |          |          | .724                  | .084         |
| Task competence         | .010                                  | .004      | 2.30     | .025     |                       |              | .100                                         | .006      | 1.60     | .114     |                       |              |
| Speaking time           | .024                                  | .006      | 3.99     | < .001   |                       |              | .067                                         | .008      | 7.92     | < .001   |                       |              |
| Physical expressiveness | .089                                  | .058      | 1.54     | .127     |                       |              | .076                                         | .083      | 0.91     | .364     |                       |              |
| Likability <sup>a</sup> | .089                                  | .066      | 1.36     | .179     |                       |              | .486                                         | .110      | 4.42     | < .001   |                       |              |

<sup>a</sup> Female team members' perceived likability in predicting female team members' performance evaluations; qualified observers' perceived likability in predicting qualified observers' performance evaluations.

Table T2

*Men: Hierarchical Fixed Effects Regression Analysis*

|                         | Team members' performance evaluations |           |          |          |                       |              | Qualified observers' performance evaluations |           |          |          |                       |              |
|-------------------------|---------------------------------------|-----------|----------|----------|-----------------------|--------------|----------------------------------------------|-----------|----------|----------|-----------------------|--------------|
|                         | <i>b</i>                              | <i>SE</i> | <i>t</i> | <i>p</i> | <i>R</i> <sup>2</sup> | $\Delta R^2$ | <i>b</i>                                     | <i>SE</i> | <i>t</i> | <i>p</i> | <i>R</i> <sup>2</sup> | $\Delta R^2$ |
| <i>Step 1</i>           |                                       |           |          |          | .042                  |              |                                              |           |          |          | .139                  |              |
| Task competence         | .009                                  | .006      | 1.53     | .133     |                       |              | .030                                         | .010      | 2.92     | .005     |                       |              |
| <i>Step 2</i>           |                                       |           |          |          | .572                  | .530         |                                              |           |          |          | .764                  | .625         |
| Task competence         | .005                                  | .004      | 1.17     | .249     |                       |              | .022                                         | .006      | 3.88     | < .001   |                       |              |
| Speaking time           | .025                                  | .005      | 5.40     | < .001   |                       |              | .051                                         | .006      | 7.96     | < .001   |                       |              |
| Physical expressiveness | .094                                  | .053      | 1.76     | .084     |                       |              | .183                                         | .074      | 2.48     | .017     |                       |              |
| <i>Step 3</i>           |                                       |           |          |          | .586                  | .014         |                                              |           |          |          | .790                  | .026         |
| Task competence         | .003                                  | .004      | 0.70     | .489     |                       |              | .015                                         | .006      | 2.44     | .018     |                       |              |
| Speaking time           | .024                                  | .005      | 5.32     | < .001   |                       |              | .049                                         | .006      | 8.05     | < .001   |                       |              |
| Physical expressiveness | .077                                  | .054      | 1.42     | .163     |                       |              | .072                                         | .083      | 0.87     | .389     |                       |              |
| Likability <sup>a</sup> | .114                                  | .087      | 1.31     | .195     |                       |              | .287                                         | .114      | 2.53     | .015     |                       |              |

<sup>a</sup> Male team members' perceived likability in predicting male team members' performance evaluations; qualified observers' perceived likability in predicting qualified observers' performance evaluations.
